# Supplementary material for: Controlled synthesis of highly stable zeolitic imidazolate framework-67 dodecahedra and their use towards the templated formation of a hollow Co3O4 catalyst for CO oxidation
Source: Royal Society of Chemistry journal article supplement (doi:10.1039/c5ra18557b), 2016-01-01
Supplement: c5ra18557b1.pdf [file c5ra18557b1.pdf]

## Supporting Information

### **Controlled synthesis of highly stable zeolitic imidazolate framework-67 dodecahedra and their use towards the templated formation of hollow Co<sub>3</sub>O<sub>4</sub> catalyst for CO oxidation**

Hongyu Wu,<sup>a</sup> Xukun Qian,<sup>a,b,\*</sup> Haiping Zhu,<sup>c</sup> Songhua Ma,<sup>a</sup> Guangshan Zhu,<sup>d</sup> and Yi Long<sup>b,\*</sup>

<sup>a</sup> School of Engineering and Design, Lishui University, Lishui 323000, PR China

<sup>b</sup> School of Materials Science and Engineering, Nanyang Technological University, Singapore 639798,  
Singapore

<sup>c</sup> School of Ecology, Lishui University, Lishui 323000, PR China

<sup>d</sup> State Key Laboratory of Inorganic Synthesis and Preparative Chemistry, Synthesis and Preparative  
Chemistry, College of Chemistry, Jilin University, Changchun 130012, China

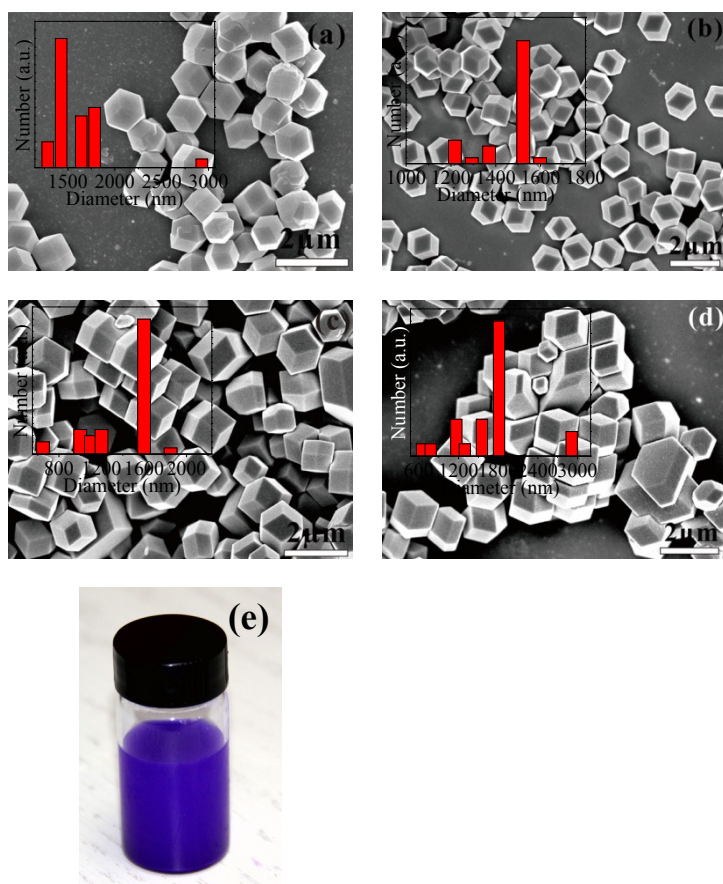

Figure S1 SEM images of the samples synthesized from different molar ratios of Hmim/Co(NO<sub>3</sub>)<sub>2</sub>·6H<sub>2</sub>O: (a) 1:4, (b) 1:8, (c) 1:16, (d) 1:32, and photograph of a purple suspension of the dry ZIF-67 powders dispersed in methanol (e). The insets show the particle size distribution of ZIF-67 crystals.

S2

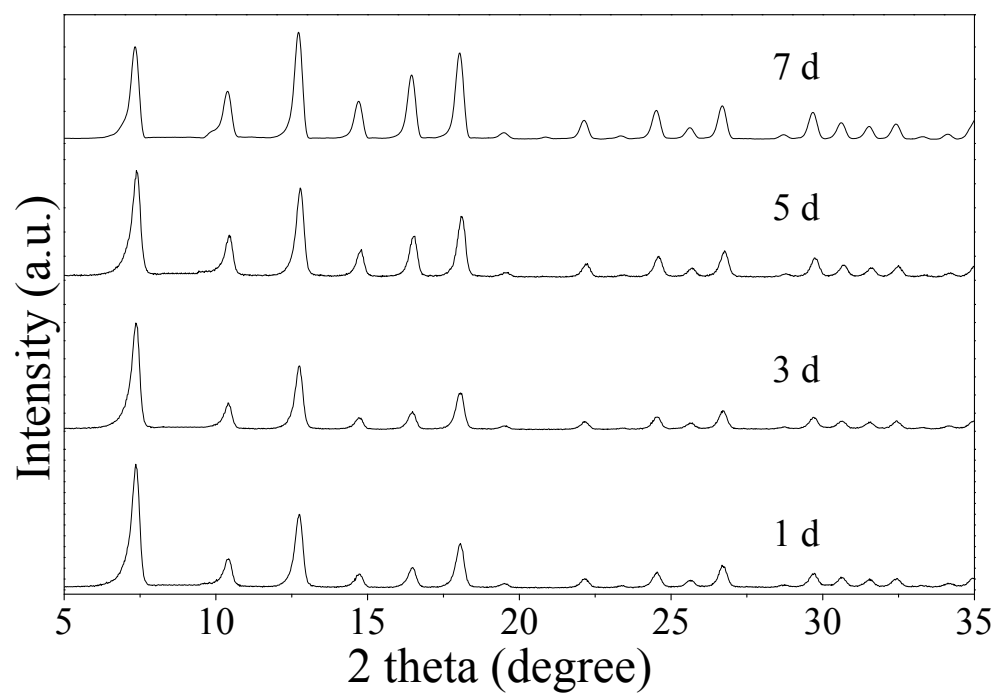

Figure S2 XRD patterns of the as-synthesized ZIF-67 samples after soaking in RT water.

S3

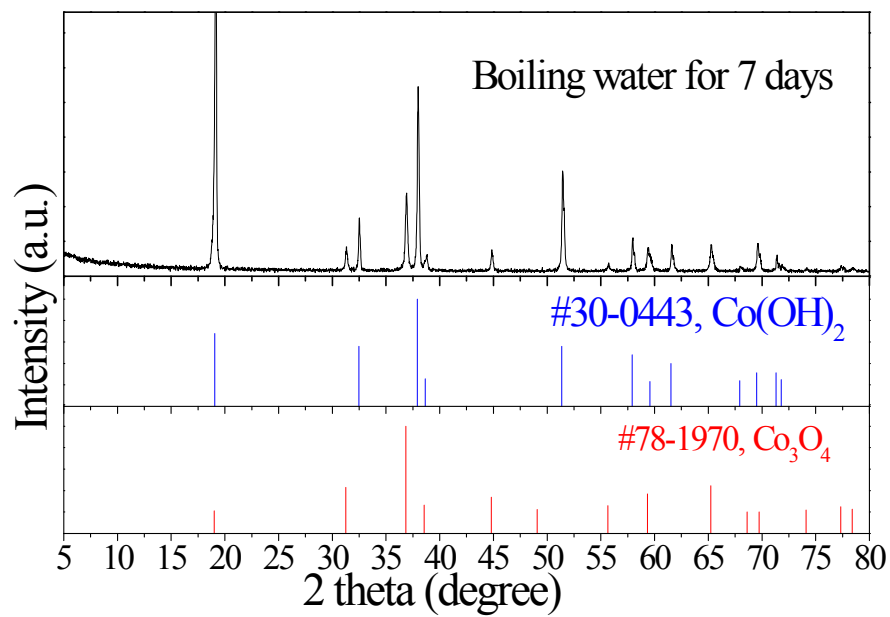

Figure S3 Wide angle XRD of the products derived from ZIF-67 after soaking in boiling water for 7 days.

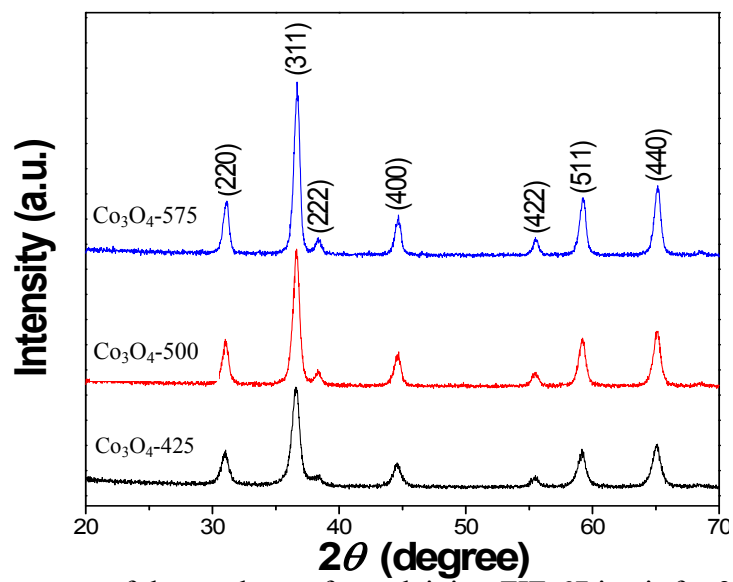

Figure S4 XRD pattern of the products after calcining ZIF-67 in air for 30 min at 425, 500 and 575 °C, respectively.

S5

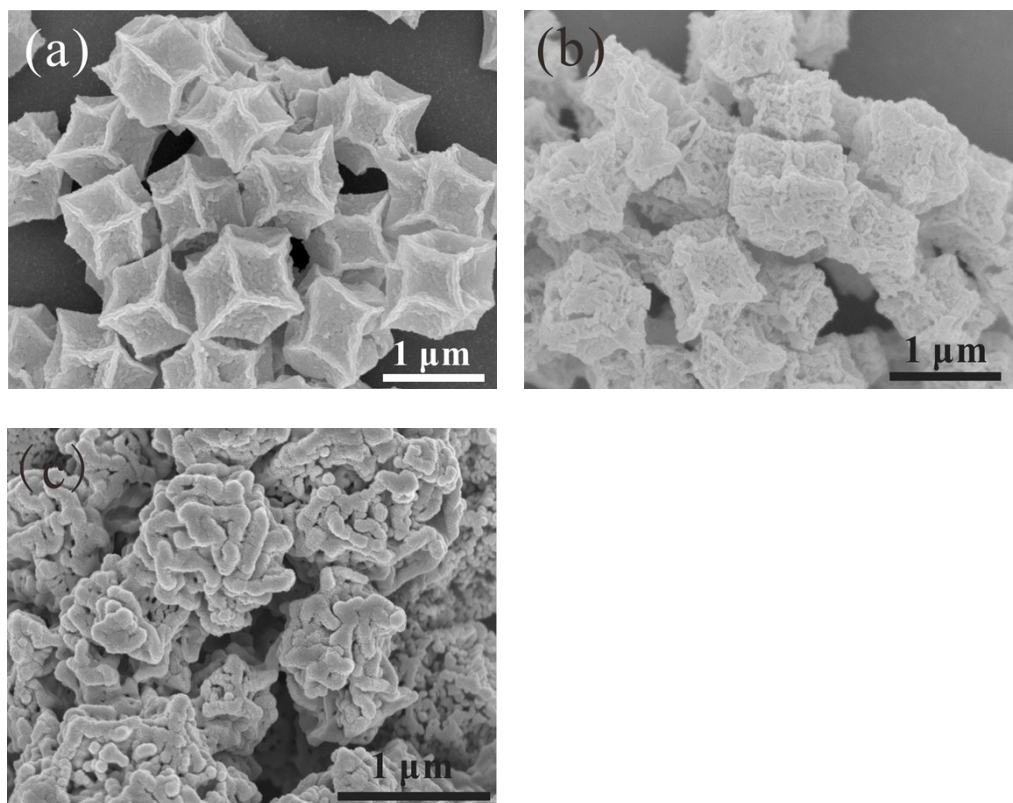

Figure S5 SEM images of  $\text{Co}_3\text{O}_4$ -425 (a),  $\text{Co}_3\text{O}_4$ -500 (b) and  $\text{Co}_3\text{O}_4$ -575 (c).

S6

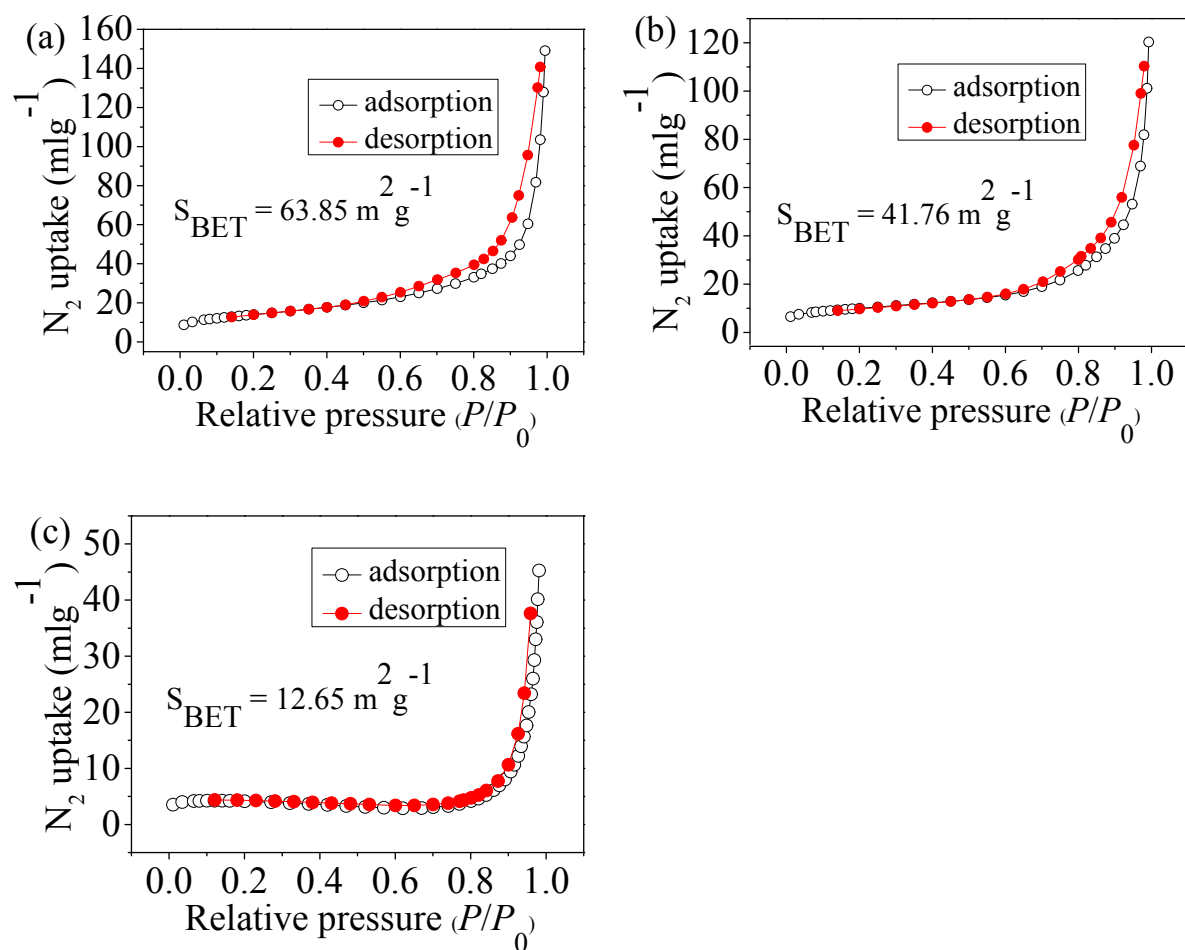

Figure S6 Nitrogen physisorption isotherms of the ZIF-67 templated  $\text{Co}_3\text{O}_4$ : (a)  $\text{Co}_3\text{O}_4$ -425, (b)  $\text{Co}_3\text{O}_4$ -500 and (c)  $\text{Co}_3\text{O}_4$ -575.

S7

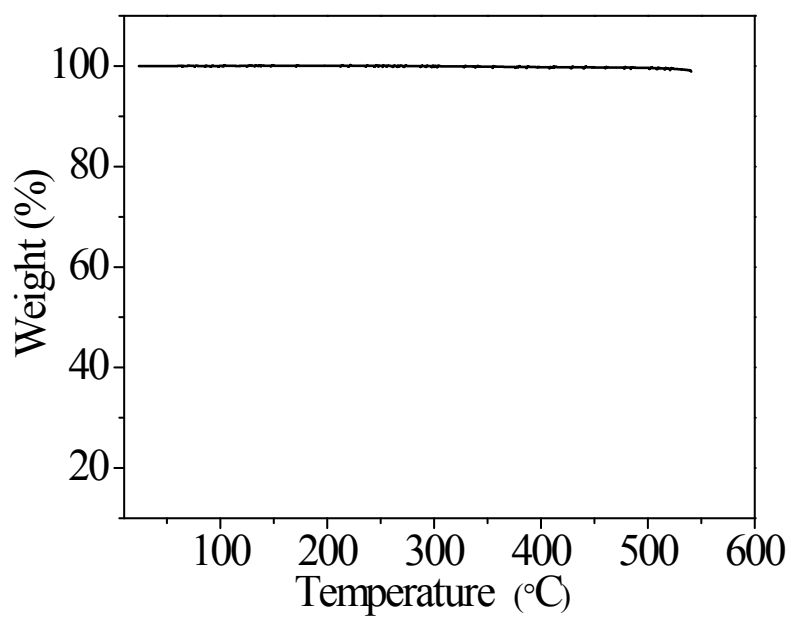

Figure S7 The TGA results of the recovered catalyst after the reaction.

S8
